# Supplementary material for: Dickeya zeae strains isolated from rice, banana and clivia rot plants show great virulence differentials
Source: PubMed Central journal article supplement (PMC6194671; doi:10.1186/s12866-018-1300-y), 2018-10-18

LB

EC1

MS2

MS3

JZL1

JZL2

JZL7

*Cucumis sativus*

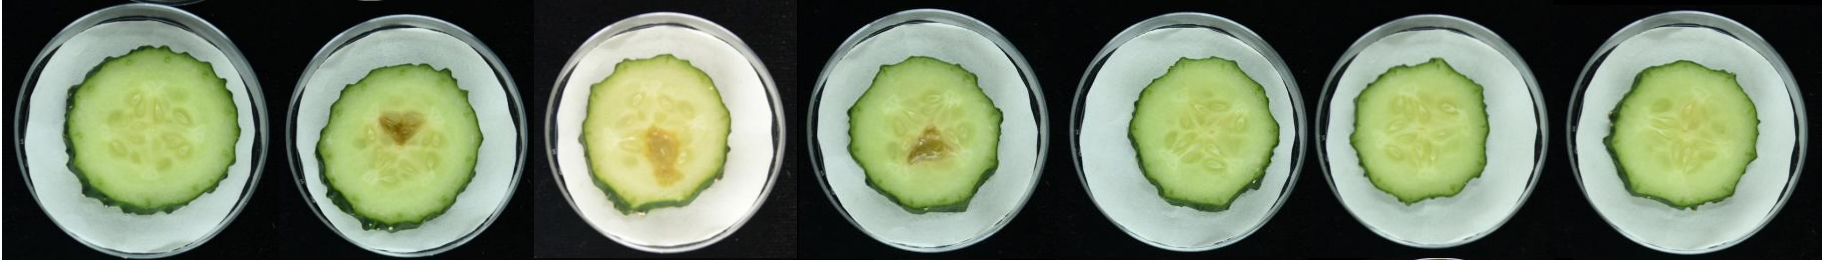

*Benincasa hispida*

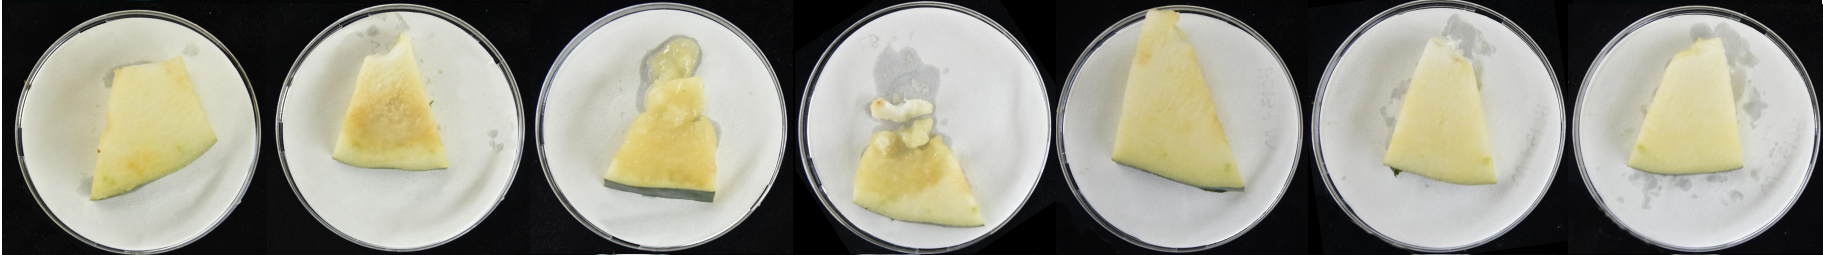

*Brassica pekinensis*

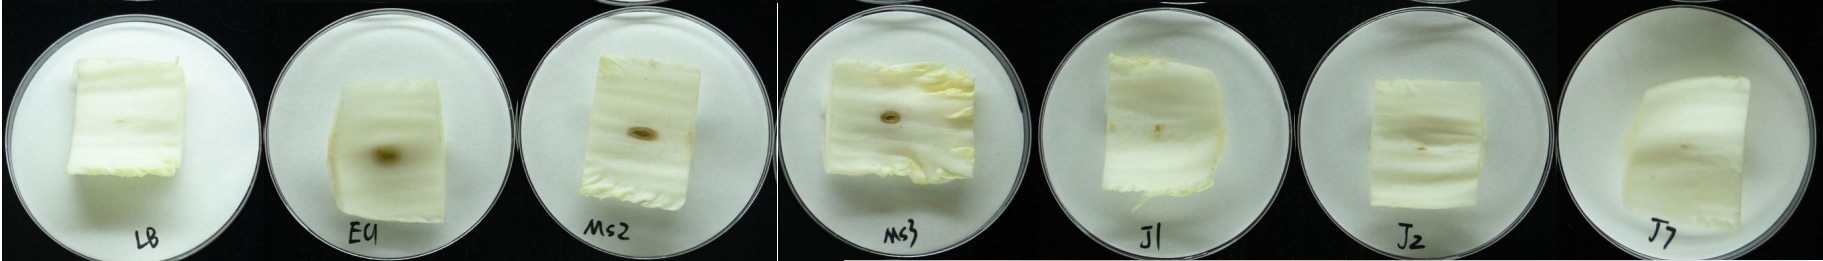

*Raphanus sativus*

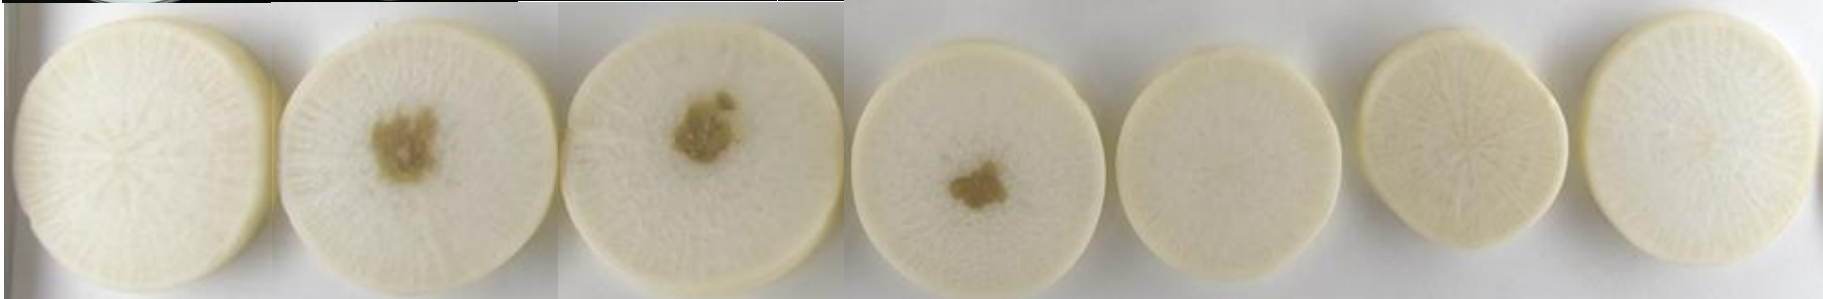

*Daucus carota*

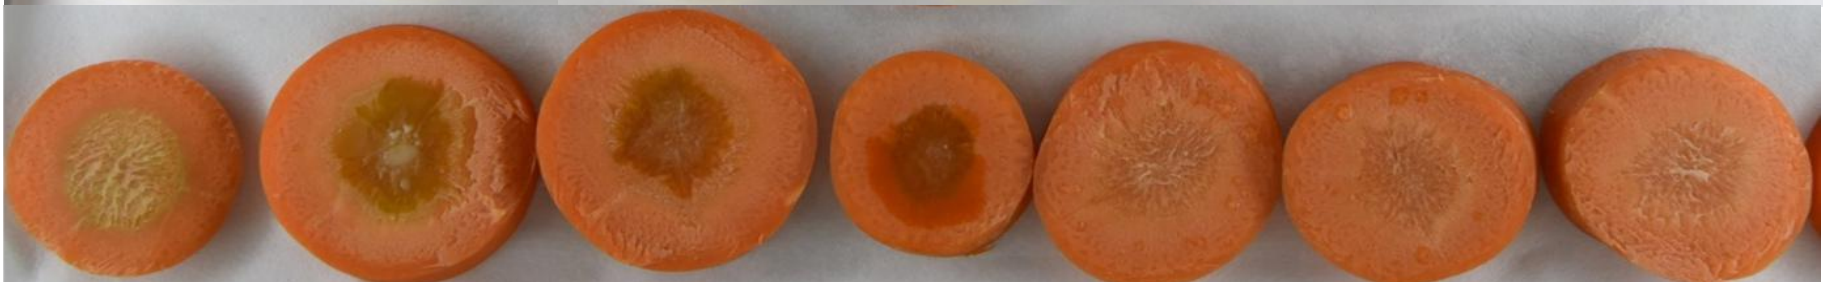

LB

EC1

MS2

MS3

JZL1

JZL2

JZL7

*Solanum tuberosm*

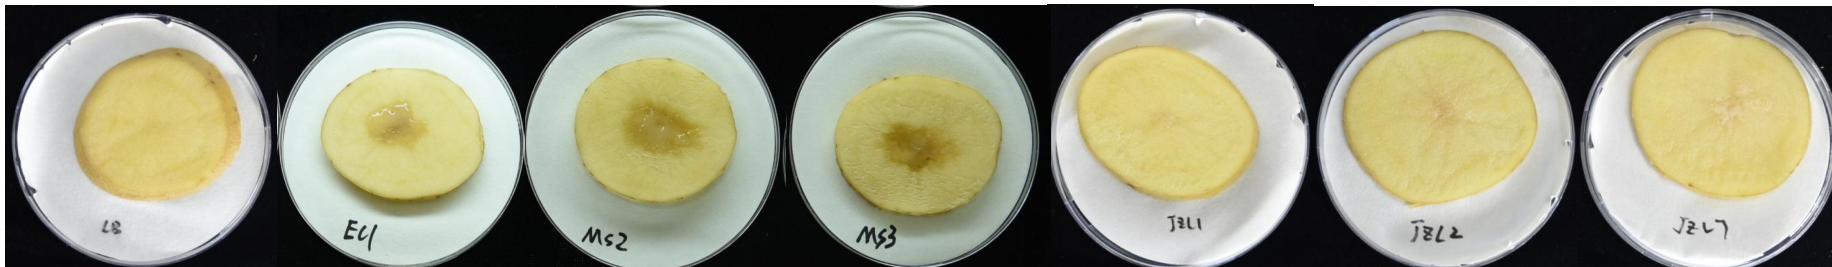

*Lycopersicon esculentum*

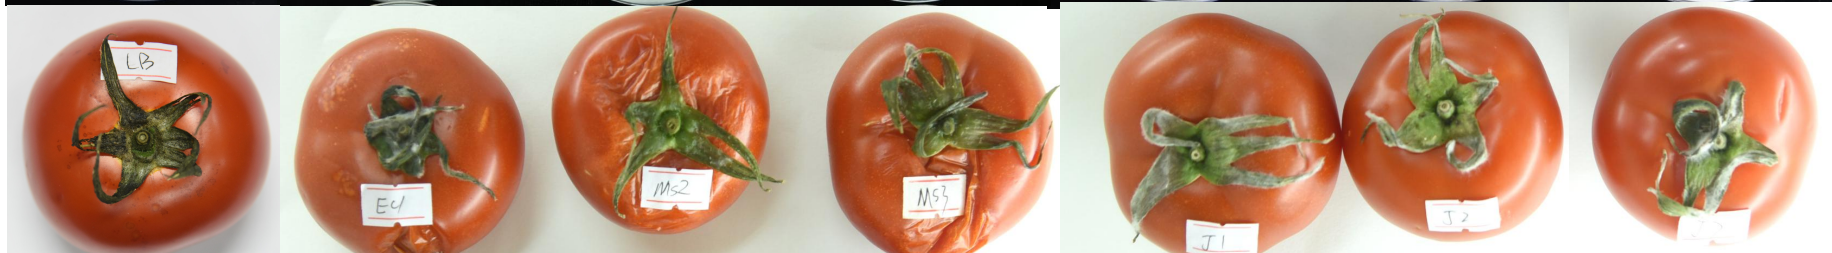

*Solanum melongena*

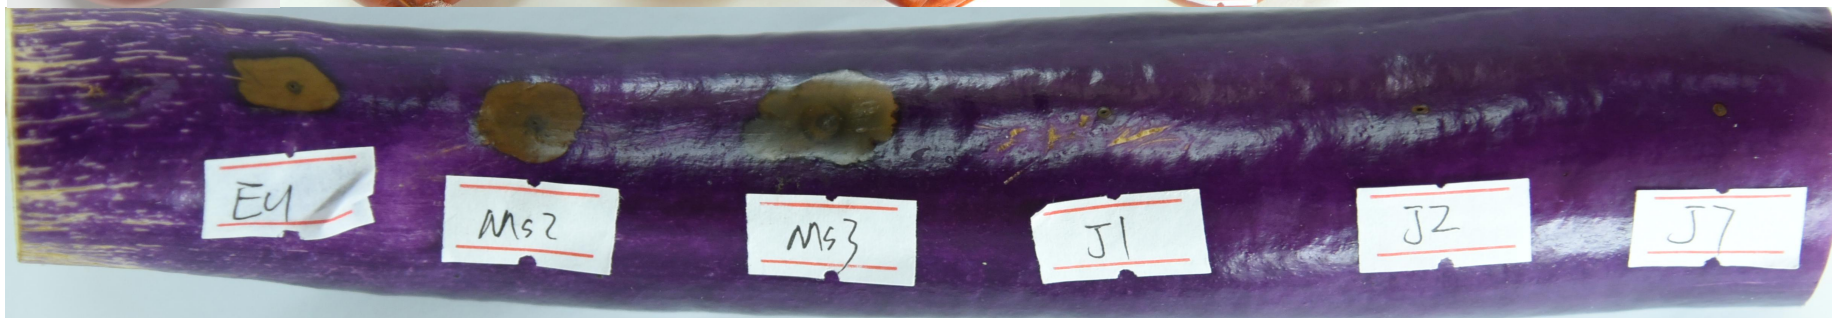

*Capsicum annuum*

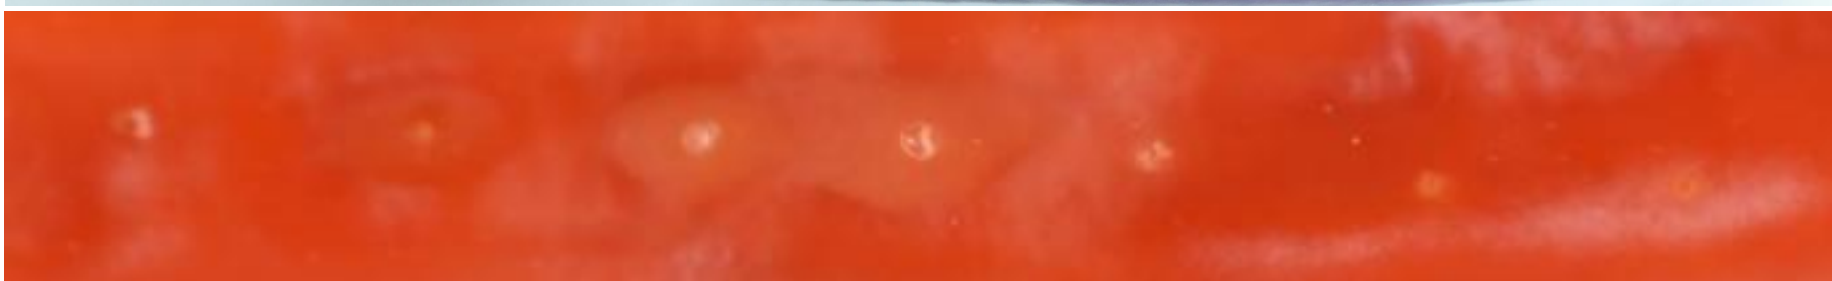

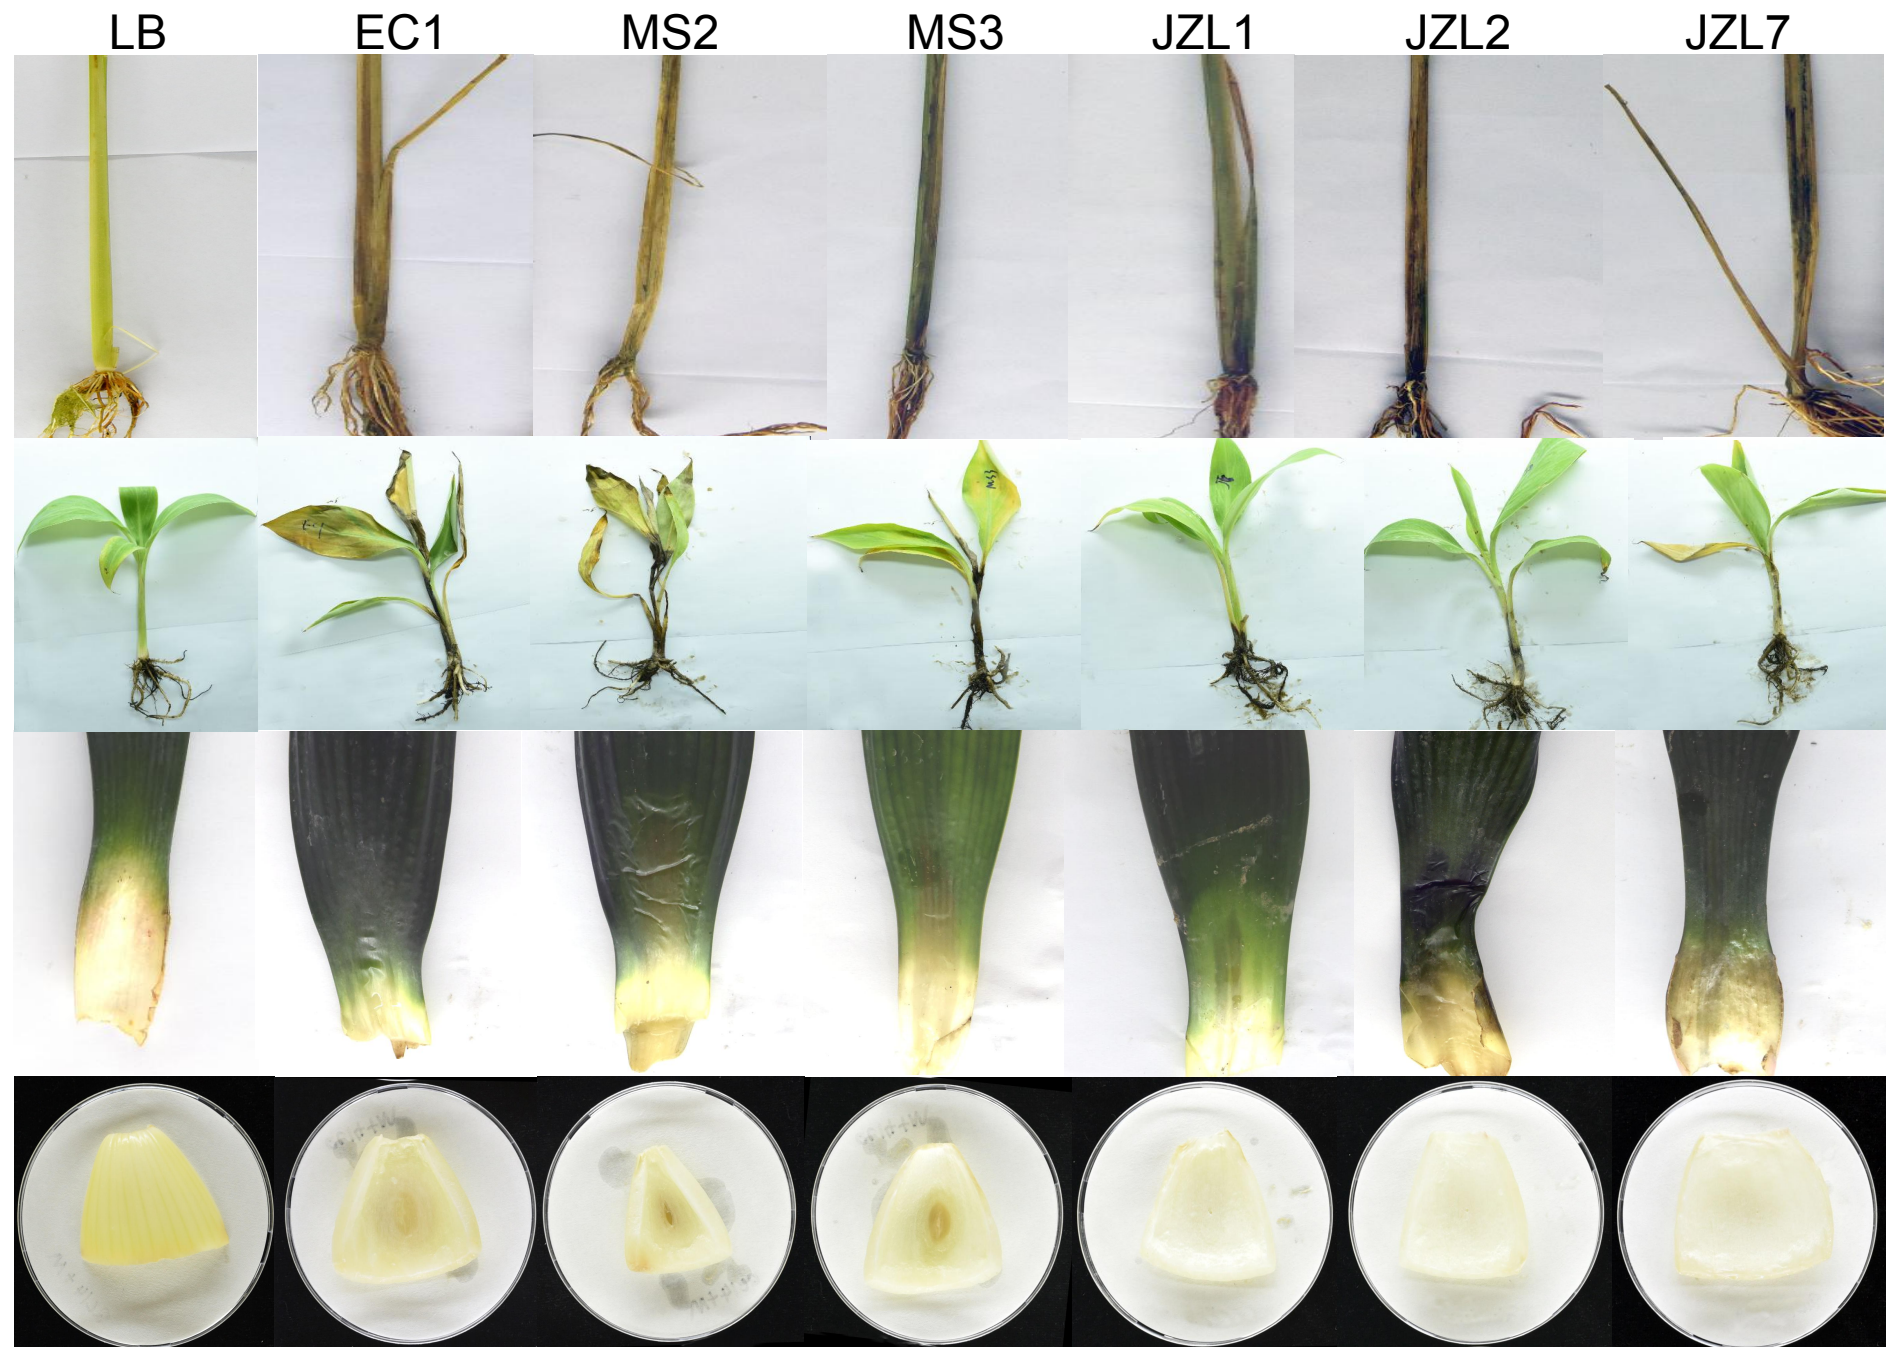

LB

EC1

MS2

MS3

JZL1

JZL2

JZL7

*Zingiber officinale*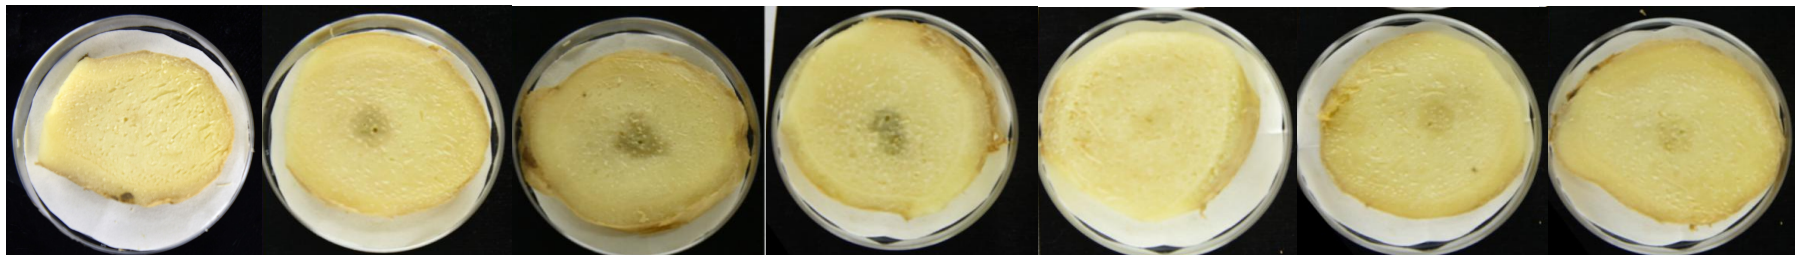*Gladiolus gandavensis*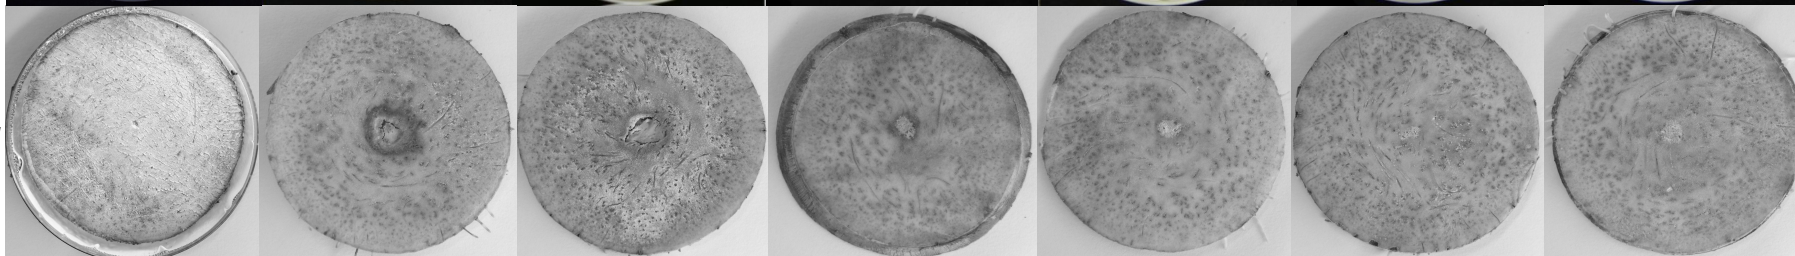*Colocasia esculenta*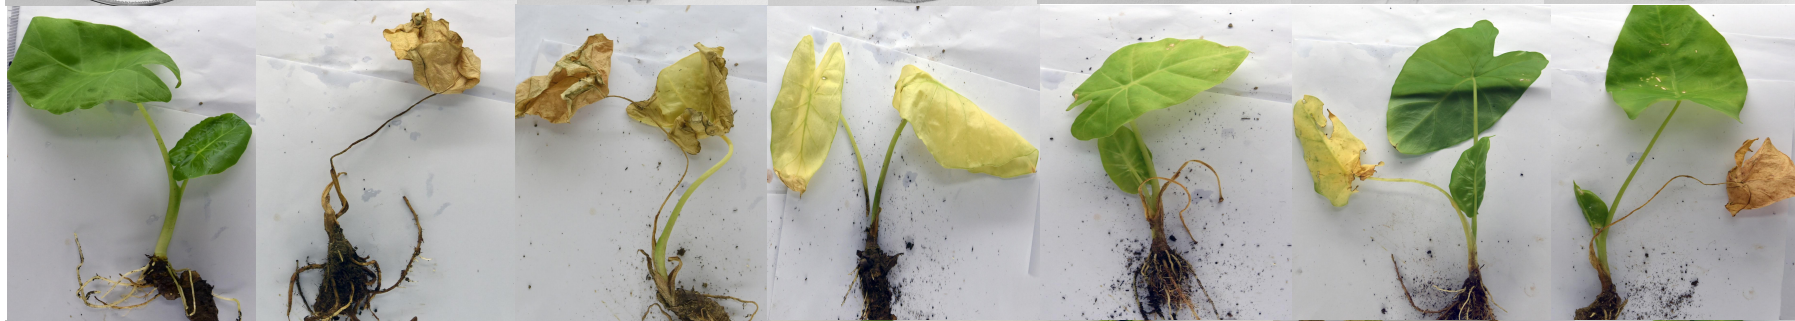*Alocasia macrorrhiza*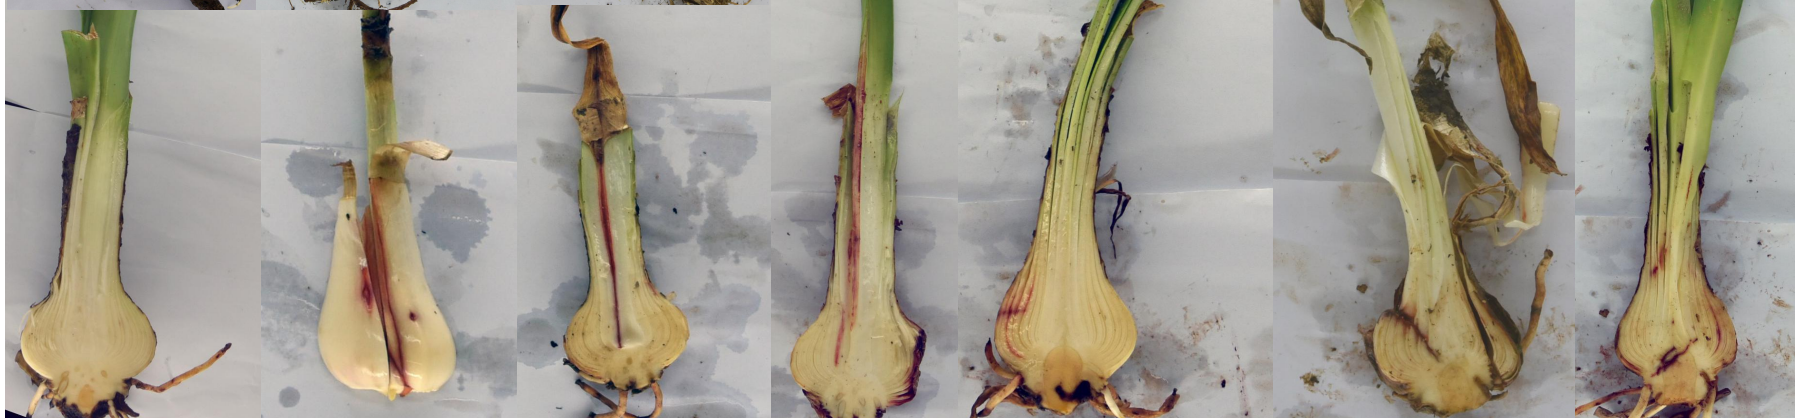

Supplement: 12866_2018_1300_MOESM3_ESM.pdf [file 12866_2018_1300_MOESM3_ESM.pdf]
