# Supplementary material for: Dickeya zeae strains isolated from rice, banana and clivia rot plants show great virulence differentials
Source: BMC Microbiol. 2018 Oct 18;18:136. doi: 10.1186/s12866-018-1300-y (PMC6194671; doi:10.1186/s12866-018-1300-y)
Supplement: Supplementary file 1 — The hosts and origins of D. zeae strains. (DOC 92 kb) [file 12866_2018_1300_MOESM1_ESM.doc]

**Additional file 1. The hosts and origins of *D. zeae* strains.**

| **Host or biological origin** | | **Geographical origin** | **Way of infection** | **Reference** |
| --- | --- | --- | --- | --- |
| Dicots | Potato | Australia, Papua New Guinea | Natural infection | [3,10,23] |
| Tobacco | Cuba | Natural infection | [3] |
| *Chrysanthemum* | USA, UK | Natural infection | [3,17] |
| *Philodendron* | Greece, USA, Florida | Natural infection | [3,22] |
| Sugarbeet | India | Artificial inoculation | [13,27] |
| Tomato | India | Artificial inoculation | [13] |
| Sweet potato | India | Artificial inoculation | [13,27] |
| Cabbage | China | Artificial inoculation | [12,28] |
| Carrot | China | Artificial inoculation | [12,28] |
| Papaya | India | Artificial inoculation | [13,27] |
| Cucumber | China | Artificial inoculation | [12] |
| Towel gourd | China | Artificial inoculation | [12] |
| *Balsamine* | China | Artificial inoculation | [28] |
| Bean | India | Artificial inoculation | **[27]** |
| Turnip | India | Artificial inoculation | **[27]** |
| Radish | India | Artificial inoculation | **[27]** |
| Eggplant | India | Artificial inoculation | **[27]** |
| Chilli | India | Artificial inoculation | **[27]** |
| Peanut | China | Artificial inoculation | [28] |
| *Kalanchoe thyrsiflora* | China | Artificial inoculation | [29] |
| *Aeonium* | China | Artificial inoculation | [29] |
| *Gymnocalycium* | China | Artificial inoculation | [29] |
| African violet | China | Artificial inoculation | [29] |
| *Dianthus* | China | Artificial inoculation | [29] |
| Poinsettia | China | Artificial inoculation | [29] |
| Monocots | Maize | USA, Brazil, France, Italy, Senegal, Cuba, Egypt, Mexico, India, Korea, Iran, Japan, China, Thailand | Natural infection | [3,13,18,23,25,27,63-67] |
| Rice | Japan, Philippines, Bangladesh, China, India, Indonesia, South Korea, North Korea, Italy | Natural infection | [10,14,15,19,20] |
| Banana | Ivory Coast, Jamaica, Panama, Martinique, China | Natural infection | [3,24] |
| Pineapple | Martinique, Queensland, Malaysia | Natural infection | [[21,](http://xueshu.baidu.com/s?wd=author:(Kogeethavani Ramachandran) &tn=SE_baiduxueshu_c1gjeupa&ie=utf-8&sc_f_para=sc_hilight=person)26] |
| *Brachiaria* | Guyana | Natural infection | [3] |
| Hyacinth | Netherlands | Natural infection | [16] |
| Clivia | China | Natural infection | This study |
| Sugarcane | China | Artificial inoculation | [28] |
| Sorghum | India | Artificial inoculation | [13,27] |
| *Belamcanda* | China | Artificial inoculation | [28] |
| *Hemerocallis* | China | Artificial inoculation | [28] |
| *Pennisetum* | India | Artificial inoculation | **[27]** |
| *Dieffenbachia* | China | Artificial inoculation | [29] |
| *Syngonium* | China | Artificial inoculation | [29] |
| Monstera | China | Artificial inoculation | [29] |
| Iris | China | Artificial inoculation | [28] |
| Onion | India, China | Artificial inoculation | [13,27] |
| Taro | China | Artificial inoculation | [29] |
| / | Water | Israel, New South Wales, Scotland, England | Not appropriate | [3,23] |
